# Supplementary material
Source: PubMed Central journal article supplement (PMC4975046)
Supplement: NIHMS784999-supplement-01.pdf [file NIHMS784999-supplement-01.pdf]

Q-PCR data are represented as mean  $\pm$  SD. Scale Bars: E=50 $\mu$ m; F and J=100  $\mu$ m.

## SUPPLEMENTAL FIGURE

Figure S1.

(A-L) Double immunostaining for GFP and several mesenchymal lineage markers in Dermo1<sup>cre</sup>: Rosa<sup>mTmG</sup> lungs at E16.5 show that the cre is active in the developing lung mesenchyme. Note the less than complete activity observed in CD31+ endothelial cells (M-P) PO4-H3 immunostaining shows that proliferation is decreased in HDAC3<sup>Dermo1creKO</sup> mutant lungs at E15.5 and E18.5. (Q-R) Double staining of SM22 $\alpha$  and Sox2 shows that airway smooth muscle differentiation and development are not altered in HDAC3<sup>Dermo1creKO</sup> lungs at E18.5. (S-T) PECAM staining shows that vascular development appears to be unaffected in HDAC3<sup>Dermo1creKO</sup> lungs. (U) Q-PCR analysis of SM22 $\alpha$  and PECAM marker reveal no significant changes in HDAC3<sup>Dermo1creKO</sup> lungs compared to control lungs. (V-Y) Assessment of cell survival by TUNEL staining shows no significant change in cell apoptosis in the HDAC3<sup>Dermo1creKO</sup> mutant lungs at E18.5. (Z) Expression of several Wnt ligands in HDAC3<sup>Dermo1creKO</sup> mutant lung Epcam+ epithelial cells is reduced. Mesenchymal expression of Wnt target genes is decreased in HDAC3<sup>Dermo1creKO</sup> mutants lungs.

Ctrl=Control; KO= Hdac3<sup>Dermo1creKO</sup> lungs. Two tail student's t test: \*\*p<0.01; NS=Not Significant. n=3 for I; n=6 for N. Q-PCR data are represented as mean  $\pm$  SD. Scale Bars: 50  $\mu$ m.

Table S1: Primer sequences

| Genes           | Forward                   | Reverse                      |
|-----------------|---------------------------|------------------------------|
| Axin2           | CAGCCCTTGTGGTTCAAGCT      | GGTAGATTCCTGATGGCCGATGT      |
| Aqp5            | ATGAACCCAGCCCGATCTTT      | ACGATCGGTCTTACCCAGAAG        |
| Abca3           | TTCATCACCTGATGGCGGTGAAC   | ACGCATGATGGCTTTGTCTACAGC     |
| CyclinA2        | GCCTTCACCATTTCATGTGGAT    | TTGCTCCGGGTAAAGAGACAG        |
| CyclinB1        | ACTTCCTCCGTAGAGCATC       | GCAGAGTTGGTGTCCATTC          |
| CyclinD1        | GCGTACCCTGACACCAATCTC     | CTCCTCTTCGCACTTCTGCTC        |
| CyclinE1        | TGTTTTTGAAGACCCAGATGA     | GGCTGACTGCTATCCTCGCT         |
| CDK1            | TTTGCAGAACTGGCCACCAA      | ACTTCTGGCCACACTTCGTTGT       |
| CDK2            | TCTGCTCTCACGGGCATTC       | AGCTGGAACAGATAGCTCTTGATGA    |
| CDK4            | GCTGGAGGCCTTTGAACATC      | CCCGATCAGTTCGGGAAGTAG        |
| CDK6            | GCGTACCCACAGAAACCATAA     | GCACTACTCTGTGAGAATGAAGAA     |
| Fgf10           | TGATGCAAAGGTTATCTGCACAT   | GAGAGTTGCACTTCATACCAAATTC    |
| Fgf9            | TTCATGCGGTGGGTTCTTATT     | TCCTCATCCAAGCTTCCATCA        |
| Foxj1           | AGTGGATCACGGACAATTCTGCT   | TTCTCCCGAGGCACCTTGTGAAG      |
| GAPDH           | GCCCTTCCACAATGCCAAAG      | ATCACCATCTTCCAGGAGCGAG       |
| P27             | AGCAGTGTCCAGGGATGAGGAA    | ATTAACCCACCGGAGCTGTTTACG     |
| P57             | CAAGAGAACTGCGCAGGAGAACAA  | TCTCTGGCCGTTAGCCTCTAAACT     |
| Pdgfr- $\alpha$ | ACCTCAGAGAGAATCGGCC       | CCATAGCTCCTGAGACCCGC         |
| Pdgfr- $\beta$  | CTCCGTAGATGAAGATGGGGC     | AGCTTTCCAACCTCGACTCCG        |
| Sftpc           | ACCCTGTGTGGAGAGCTACCA     | TTTGCGGAGGGTCTTTCCT          |
| Scgb1a1         | ATACCCTCCACAAGAGACCAGGATA | ACACAGGGCAGTGACAAGGCTTTA     |
| SM22a           | TTCCAGGTGTGGCTGAAGAATGGT  | TTGATGACTCCATAATCTTCAGCT     |
| SMA             | ACCACCATGTACCCAGGCATTCT   | CCACGAGTAACAAATCAAAGCTTTGGGC |
| TubblV          | AACCCGGCACCATGGACTCTGT    | TGCCTGCTCCGGATTGACCAAATA     |
| Vimentin        | TGACCTTGAACGGAAAGTGG      | GGACATGCTGTTCTGAATCT         |
| Wnt2            | TCTTGAAACAAGAATGCAAGTGTC  | GAGATAGTCGCCTGTTTTCTGAA      |
| Wnt2b           | GGAATTGCACCACACTGGA       | CCTGCTGACGAGATAGCATAGA       |
| Wnt7a           | GGACGCTCATGAACTTACACA     | TGACACACCATGGCACTTAC         |
| Wnt 5a          | AATTCCTCGGCCGCCTTCGC      | GCGGTCCCCAAAGCCACTCC         |
| Wnt7b           | GGATGCCCGTGAGATCAAAA      | CACACCGTGACACTTACATTCCA      |
| Wnt11           | TTGACCTGGAGAGAGGTACA      | CGATGGTGTGACTGATGG T         |
